# Supplementary material
Source: PubMed Central journal article supplement (PMC2790261)
Supplement: tjp0587-5239-SD1.pdf [file tjp0587-5239-SD1.pdf]

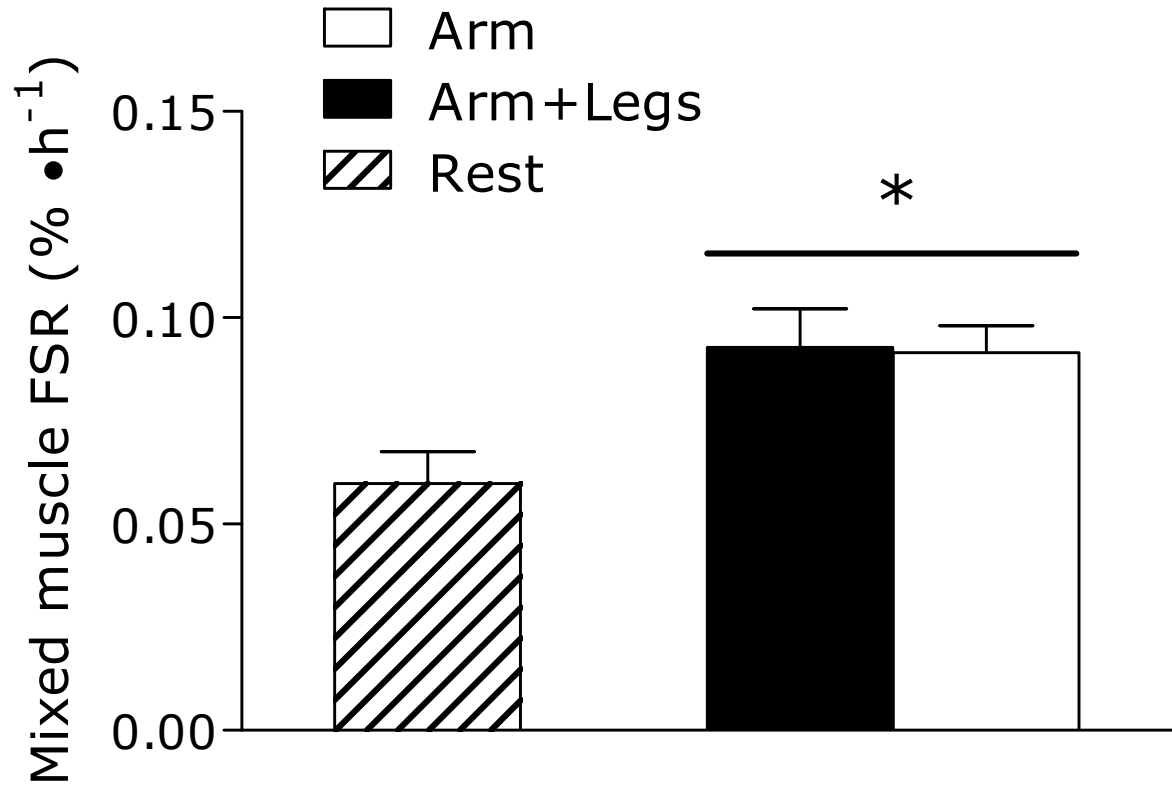

Supplementary Figure 1. Rate of mixed muscle protein synthesis in the fed state at rest and following Arm and Arm+Legs exercise protocols. \*Significantly different from rest,  $P < 0.01$ . Values are means  $\pm$  SE.

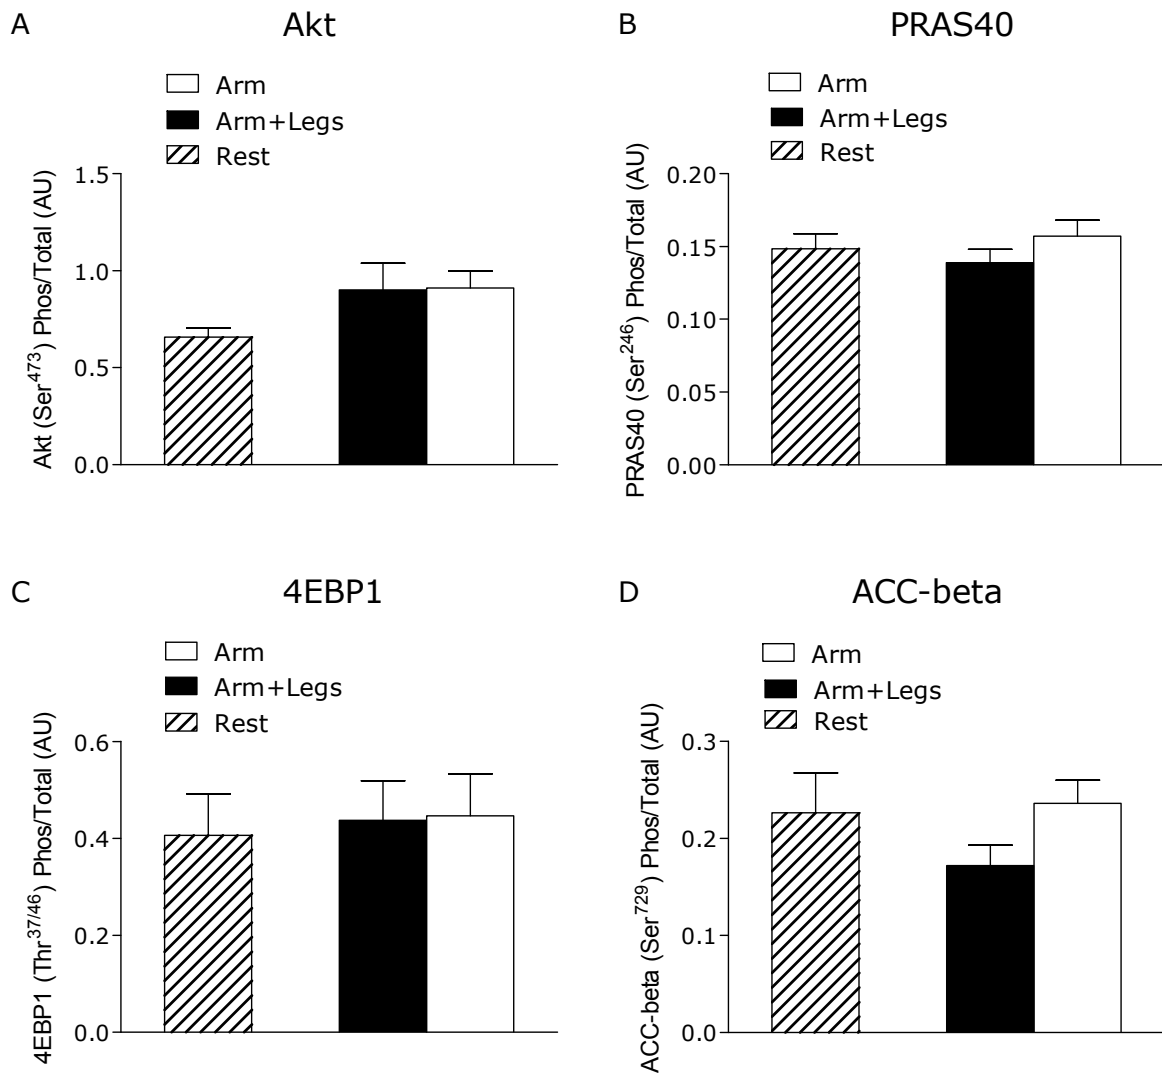

Supplementary Figure 2. Phosphorylated to total protein ratio of Akt (A), PRAS40 (B), 4EBP1 (C) and ACC-beta (D) at rest and after Arm and Arm+Legs exercise protocols.
